# Supplementary material
Source: PubMed Central journal article supplement (PMC2819929)

## Cortical Thickness Asymmetry Comparison Maps: 22q11DS vs. Controls

**a.** Areas with greater asymmetry in 22q11DS

**b.** Areas with reduced asymmetry in 22q11DS

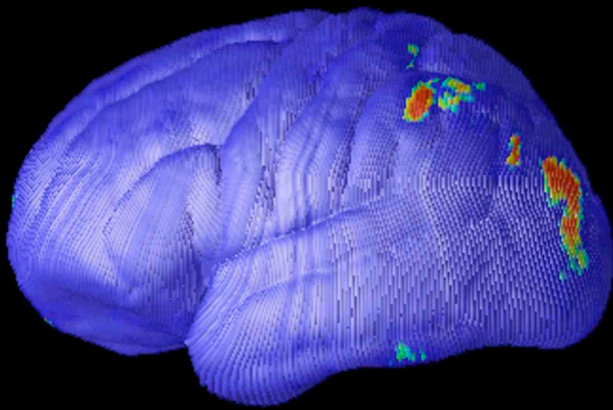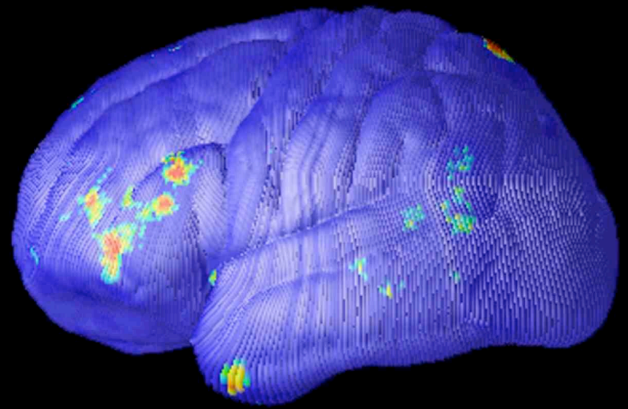

Significance

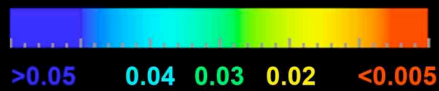

Supplement: NIHMS160112-supplement-Supplementary_Data4.pdf [file NIHMS160112-supplement-Supplementary_Data4.pdf]
