# Supplementary material
Source: PubMed Central journal article supplement (PMC2819929)

**Cognitive Profile of 22q11DS: Selective Deficit in Visuospatial Memory**  
(*N=31*)

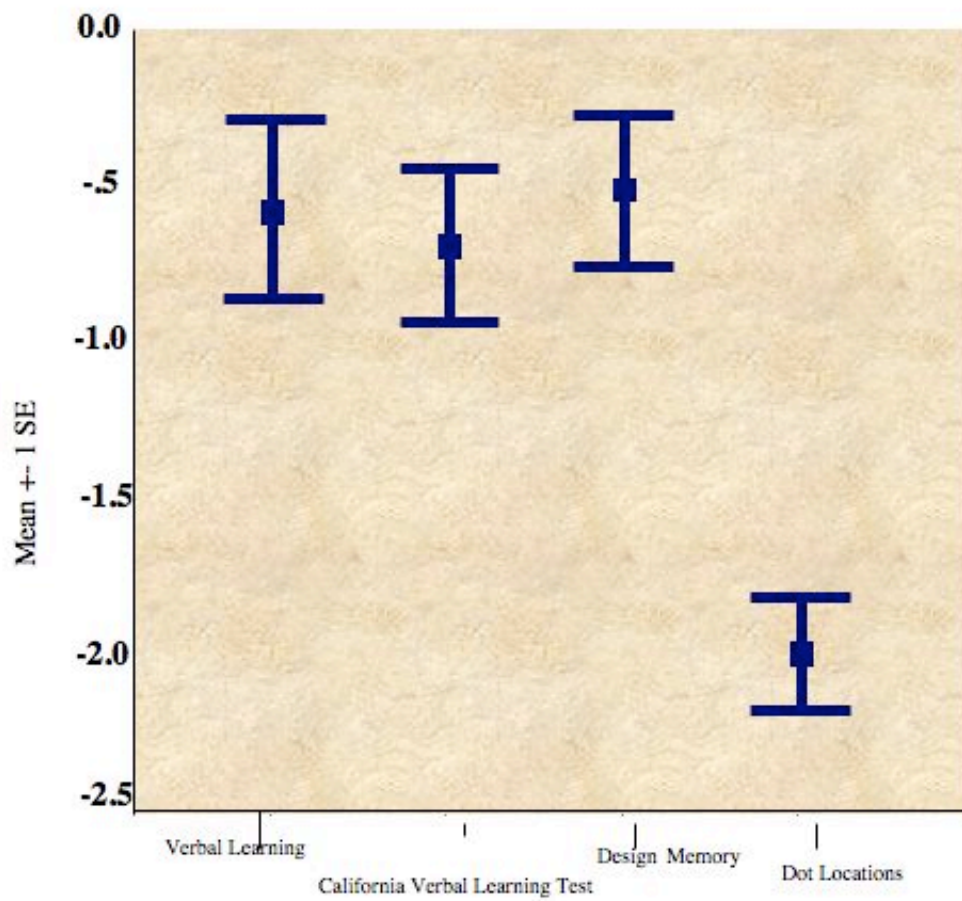

Supplement: NIHMS160112-supplement-Supplementary_Data2.pdf [file NIHMS160112-supplement-Supplementary_Data2.pdf]

**a**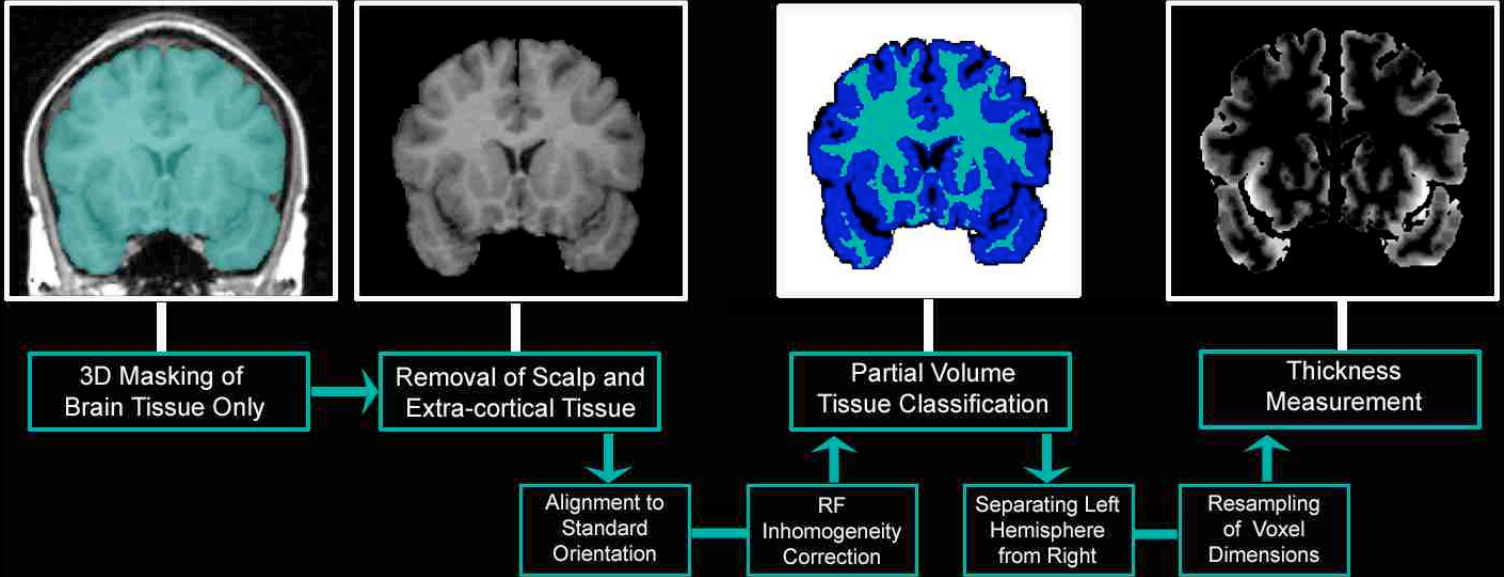**b**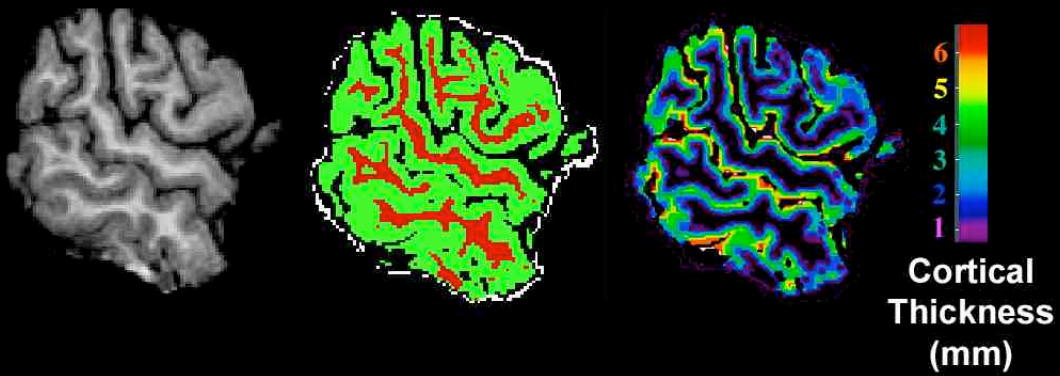

Supplement: NIHMS160112-supplement-Supplementary_Data3.pdf [file NIHMS160112-supplement-Supplementary_Data3.pdf]

## EXCESS IN WILLIAMS

**a**

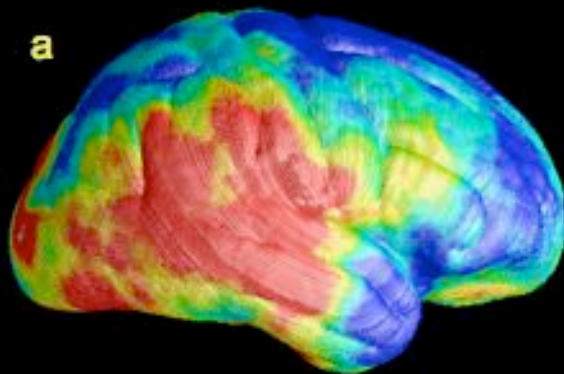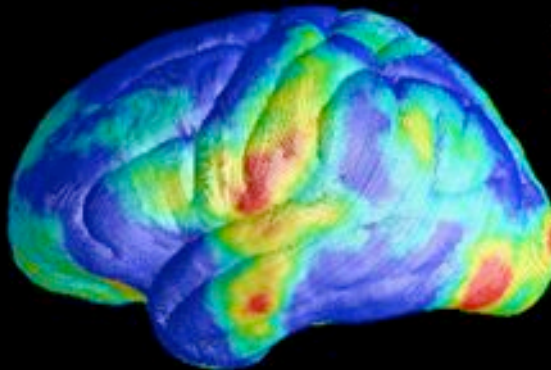

10% thicker

10%

5%

0%

Same

## THINNING IN WILLIAMS

**b**

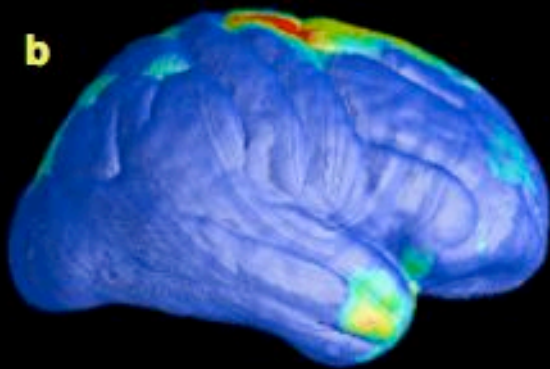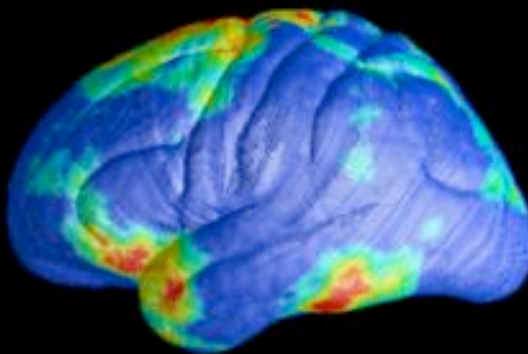

Same

or

thicker

0%

5%

10%

10%

thinner

Supplement: NIHMS160112-supplement-Supplementary_Data5.pdf [file NIHMS160112-supplement-Supplementary_Data5.pdf]
